# Supplementary material for: Ideas and perspectives: Land-ocean connectivity through groundwater
Source: Copernicus journal article supplement (doi:10.5194/bg-2022-148), 2022-07-08
Supplement: Supplementary file [file bg-2022-148-RC1-supplement.pdf]

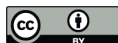

## Ideas and perspectives: Land-ocean connectivity through groundwater

- 5 Damian L. Arévalo-Martínez <sup>1,2,\*</sup>, Amir Haroon <sup>1,\*</sup>, Hermann W. Bange <sup>1</sup>, Ercan Erkul <sup>2</sup>, Marion Jegen <sup>1</sup>,  
Nils Moosdorf <sup>2,3</sup>, Jens Schneider von Deimling <sup>2</sup>, Christian Berndt <sup>1</sup>, Michael Ernst Böttcher <sup>4,5,6</sup>, Jasper  
Hoffmann <sup>7</sup>, Volker Liebetrau <sup>1,†</sup>, Ulf Mallast <sup>8</sup>, Gudrun Massmann <sup>9</sup>, Aaron Micallef <sup>1,10</sup>, Holly A.  
Michael <sup>11</sup>, Hendrik Paasche <sup>8</sup>, Wolfgang Rabbel <sup>2</sup>, Isaac Santos <sup>12</sup>, Jan Scholten <sup>2</sup>, Katrin Schwalenberg  
<sup>13</sup>, Beata Szymczycha <sup>14</sup>, Ariel T. Thomas <sup>10</sup>, Joonas J. Virtasalo <sup>15</sup>, Hannelore Waska <sup>9</sup>, Bradley Weymer  
<sup>16</sup>.
- 10 <sup>1</sup> GEOMAR Helmholtz Centre for Ocean Research Kiel, Kiel, 24105, Germany  
<sup>2</sup> Kiel University, Kiel, 24118, Germany  
<sup>3</sup> Leibniz Centre for Tropical Marine Research (ZMT), Bremen, 28359, Germany  
<sup>4</sup> Leibniz Institute for Baltic Sea Research Warnemünde (IOW), Rostock, 18119, Germany  
<sup>5</sup> Marine Geochemistry, University of Greifswald, Greifswald, 17489, Germany  
15 <sup>6</sup> Interdisciplinary Faculty, University of Rostock, Rostock, 18051, Germany  
<sup>7</sup> Alfred-Wegener-Institute, Helmholtz Centre for Polar and Marine Research, Bremerhaven, 27515,  
Germany  
<sup>8</sup> Helmholtz Centre for Environmental Research, Leipzig, 04318, Germany  
<sup>9</sup> Carl von Ossietzky University of Oldenburg, Oldenburg, 26129, Germany  
20 <sup>10</sup> University of Malta, Msida, MSD 2080, Malta  
<sup>11</sup> University of Delaware, Newark, DE 19716, USA  
<sup>12</sup> Department of Marine Science, University of Gothenburg, Gothenburg, 40539, Sweden  
<sup>13</sup> Federal Institute for Geosciences and Natural Resources, Hannover, 30655, Germany  
<sup>14</sup> Institute of Gdańsk Polish Academy of Sciences, Sopot, 81-712, Poland  
25 <sup>15</sup> Marine Geology, Geological Survey of Finland (GTK), Espoo, 02150, Finland  
<sup>16</sup> School of Oceanography, Shanghai Jiao Tong University, China  
† deceased

\* Correspondence to:

- 30 Damian L. Arévalo-Martínez ([darevalo@geomar.de](mailto:darevalo@geomar.de)) or Amir Haroon ([aharoon@geomar.de](mailto:aharoon@geomar.de))

**Abstract.** For millennia humans have gravitated towards coastlines for their resource potential and as  
geopolitical centres for global trade. A basic requirement ensuring water security for coastal communities  
relies on a delicate balance between the supply and demand of potable water. The interaction between  
freshwater and saltwater in coastal settings is, therefore, complicated by both natural and human-driven  
35 environmental changes at the land-sea interface. In particular, ongoing sea level rise, warming and  
deoxygenation might exacerbate such perturbations. In this context, an improved understanding of the  
nature and variability of groundwater fluxes across the land-sea continuum is timely, yet remains out of

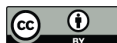

reach. The flow of terrestrial groundwater across the coastal transition zone as well as the extent of  
freshened groundwater below the present-day seafloor are receiving increased attention in marine and  
40 coastal sciences because they likely represent a significant, yet highly uncertain component of  
(bio)geochemical budgets, and because of the emerging interest in the potential use of offshore freshened  
groundwater as a resource. At the same time, “reverse” groundwater flux from offshore to onshore is of  
prevalent socio-economic interest as terrestrial groundwater resources are continuously pressured by  
overpumping and seawater intrusion in many coastal regions worldwide. An accurate assessment of the  
45 land-ocean connectivity through groundwater and its potential responses to future anthropogenic  
activities and climate change will require a multidisciplinary approach combining the expertise of  
geophysicists, hydrogeologists, (bio)geochemists and modellers. Such joint activities will lay the  
scientific basis for better understanding the role of groundwater in societal-relevant issues such as climate  
change, pollution and the environmental status of the coastal oceans within the framework of the United  
50 Nations Sustainable Development Goals. Here, we present our perspectives on future research directions  
to better understand land-ocean connectivity through groundwater, including the spatial distributions of  
the essential hydrogeological parameters, highlighting technical and scientific developments, and briefly  
discussing its societal relevance in rapidly changing coastal oceans.

## 1 Background

55 The exchange of groundwater between land and ocean is a wide-spread phenomenon, which has  
significant impacts on the biogeochemical cycles of the coastal ocean (e.g. Church, 1996; Moore, 2010;  
Santos et al., 2021). Coastal margins play a disproportionately important role for productive marine  
ecosystems compared to the open ocean due to their greater biological productivity, sediment-water  
interactions and air-sea transfer of climate-relevant trace gases (Liu et al., 2010). Increasing  
60 anthropogenic activities result in high nutrient fluxes into the coastal ocean, leading to eutrophication,  
deoxygenation and release of greenhouse gases, which in turn could exacerbate the current global  
warming trend and significantly affect the livelihood of nations that rely on coastal ecosystem services  
(e.g. Van Meter et al., 2018; Oehler et al., 2021; Rocha et al., 2021). In addition, accelerating global sea  
level rise (GSLR) can negatively influence terrestrial coastal aquifers due to the inland displacement of  
65 the fresh-saline-water interfaces, referred to as saltwater intrusion (SWI; Ferguson and Gleeson, 2012;  
Taylor et al., 2013). In turn, increased human usage of groundwater resources is estimated to account for  
approximately 14% of the observed GSLR through a net transfer of freshwater from deep reservoirs into  
the ocean (Konikow, 2011; Church et al., 2013; Taylor et al., 2013). Increasing usage of non-renewable  
70 groundwater might further exacerbate global water depletion (Bierkens and Wada, 2019), which is further  
impacted by climate variability through changes in recharge and precipitation (Thomas and Famiglietti,  
2019; Beebe et al., 2022).

The cross-shelf extension of terrestrial coastal groundwater systems can be distinguished into two key  
(often interrelated) elements (see Table 1 and Fig. 1). **The first comprises meteoric groundwater transport  
75 (flux) from terrestrial coastal aquifers through the seafloor into the ocean, which is generally referred to  
as fresh submarine groundwater discharge (FSGD; e.g. Kohout, 1964; Taniguchi et al., 2019).** The second

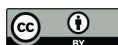

consists of large (> 10 km horizontal extent) freshened (and often brackish) groundwater reservoirs embedded in sediment and rocks below the present-day seafloor, collectively called offshore freshened groundwater (OFG; Post et al., 2013).

80

FSGD connects terrestrial groundwater systems to the coastal ocean on most coastlines in the world (Fig. 2; Luijendijk et al., 2020). FSGD is essentially the surplus of the terrestrial water budget. Most known FSGD occurs within the first few 100 meters from the coast, although its occurrence has also been reported at tens to hundreds of kilometres offshore (Manheim, 1967; Kooi et al., 2001; Bratton et al., 2010). Given the large degree of spatio-temporal variability in FSGD, estimates of regional and global fluxes are still highly uncertain (Taniguchi et al., 2019). Globally, FSGD accounts for 1–10 % of the global freshwater input to the ocean (Abbott et al., 2019; Luijendijk et al., 2020). Locally, however, FSGD can be key for sustaining some marine ecosystems (Luijendijk et al., 2020).

85

90 Similar to FSGD, OFG has been observed in shelf sediments throughout the world's oceans (Fig.2; Post et al., 2013; Micallef et al., 2021). Likewise, OFG is a potential freshwater resource, or a resource of water that can be treated with desalination with comparably small energy consumption (Bakken et al., 2012), and has therefore gained increased attention over the past decade (Post et al., 2013; Micallef et al., 2021). Although OFG is generally a relic of past sea-level low stand (fossil groundwater), some reservoirs are likely hydraulically connected to the terrestrial aquifers groundwater system, as shown for the U.S. Atlantic coast (Gustafson et al., 2019; Thomas et al., 2019), Canterbury Bight, New Zealand (Micallef et al., 2020; Weymer et al., 2020), and the Achziv submarine canyon in northern Israel (Paldor et al., 2020). Here, we emphasize the importance of improving our understanding of connected OFG, since its extraction as an unconventional resource for mitigating temporal water scarcity in coastal communities might cause seawater intrusion (Yu and Michael, 2019a) and distant land subsidence (Chen et al., 2007; Yu and Michael, 2019b).

95

100

With ongoing research in near-coastal groundwater fluxes (FSGD) and offshore reservoirs (OFG) carried out by largely different scientific communities, we address unexploited scientific and technical synergies between them. The reliance on markedly different methodologies leads to differences in scientific language, and in turn conceptually disconnects the research of both phenomena (FSGD is usually assessed using geochemical tracers and hydrological observations from the intertidal zone or numerical groundwater modelling (Taniguchi et al., 2019; Luijendijk et al., 2020), whereas OFG studies often require ship-based geophysical methods (Micallef et al., 2021)). Here we present new perspectives on future research directions to improve the understanding of land-ocean connectivity through groundwater, with particular focus on joint activities of FSGD and OFG research communities. This includes *i*) improving our quantitative understanding of the distribution and variability of groundwater fluxes at regional and global scales, *ii*) assessing long-term changes in groundwater sources and their expected impact on marine environments, as well as potential usage, and *iii*) evaluating conceptual and technological developments which will potentially advance joint FSGD-OFG research.

110

115



## 120 **2 Distribution and variability of groundwater fluxes**

### Fresh submarine groundwater discharge

The interaction between saline and fresh groundwater in coastal regions is governed by complex processes, e.g. density contrasts between fresh and saline water, tidal effects, and geological heterogeneity (Michael et al., 2016; Jiao and Post, 2019). Saline groundwater can intrude landward salinizing terrestrial aquifers (resulting in SWI). Yet, at the same time, terrestrial groundwater can cross the land-sea continuum and appear offshore as FSGD and/or OFG (Fig. 2; see e.g. Whitticar, 2002; Post et al. 2013; Jurasinski et al., 2018; Micallef et al. 2020). Groundwater flow is associated with external forcing (e.g. groundwater heads, framework geology, onshore groundwater usage, sea level) that dictate the hydrostatic gradient causing fluxes to be directed inland, offshore or both. Strong distortions of hydraulic gradients can influence or even reverse groundwater flow, which, in turn, might have widespread consequences for pelagic and benthic marine ecosystems (e.g. Donis et al., 2017; Lecher and Mackey, 2018; Szymczycha et al., 2020; Santos et al., 2021), as well as for associated services such as fisheries, because both nutrients and contaminants are transported into the coastal ocean via groundwater. A recent study estimated the global input of groundwater into the ocean via FSGD to be less than 1% of the surface-water runoff. However, on local scales FSGD can reach 25% of the river flux (Luijendijk et al., 2020), and saline SGD releases recycled nutrients at rates comparable to global rivers (Santos et al., 2021). The high spatial variability of this influx is partly controlled by climate at regional scale, and partly by lithological heterogeneities at local scale (Sawyer et al., 2016). Because the extrapolation of point-scale measurements onto a regional, continental, or global scale is difficult, FSGD quantification heavily relies on hydrogeological modelling (Moosdorf et al., 2021), which can result in great uncertainties on large spatial scales.

### Offshore freshened groundwater

OFG resides beneath the seafloor along continental shelves and, in contrast to FSGD, is commonly assumed to have minimal groundwater flow velocities (e.g. Micallef et al. 2020). Recent estimates report OFG to comprise a volume of approximately  $1 \cdot 10^6 \text{ km}^3$  (Micallef et al., 2021). Different OFG emplacement mechanisms have been proposed, from which meteoric recharge, sub- and proglacial injection, diagenesis and the decomposition of gas hydrates are the most significant (Micallef et al., 2021). OFG systems may be coupled with FSGD (e.g. Paldor et al., 2020; Attias et al., 2021), and modelling shows that FSGD and OFG can occur in equilibrium with present-day sea level for a range of different stratigraphic configurations (Michael et al., 2016). However, OFG can also be decoupled from interaction with the water column (see e.g. Micallef et al., 2020). Post et al. (2013) compiled a global estimation of OFG sites based mainly on borehole observations. Geophysical technologies have updated these global estimates through the detection of OFG residing within siliciclastic continental margins in the United States and New Zealand (Gustafson et al., 2019; Micallef et al., 2020), along a carbonate coastline in Malta (Haroon et al., 2021), and offshore from the volcanic islands of Hawaii (Attias et al., 2021). These studies have improved our understanding of spatial OFG distributions, but do not bridge the knowledge gap between coastal nearshore and offshore hydrological systems. To date, continuous tracing of terrestrial aquifers along the full onshore-offshore gradient remains technically challenging (Weymer et



165 al., 2020), and observation strategies need to be developed for specific settings. Geophysical methods  
employed as imaging tools to characterize the subsurface offer promising avenues towards bridging the  
information gap across the land-sea interface, although they are only currently available on local scales  
(e.g. Siemon et al., 2020; Ishizu and Ogawa, 2021). Hydrologically connected OFG systems should in  
principle be associated with discharging groundwater (see e.g. Weymer et al., 2020), either close to the  
coastline, along faults or other lithological discontinuities, or at distant locations near the shelf break.  
However, OFG could also seep into the marine environment on time scales of >100–1000 kyr, making it  
difficult to obtain observations that provide insights on its effects on biological communities if no  
dedicated offshore drilling is carried out.

170

### 3 Environmental impacts and resource prospects

175 In the terrestrial realm, the role of coastal groundwater as a habitat (Pohlman, 2011; Leitão et al., 2015;  
Adyasari et al., 2019) and in shaping pelagic and benthic coastal communities (Lecher and Mackey, 2018;  
Oberle et al., 2022) has become increasingly recognized. In contrast, the role of OFG  as a fresh- or  
brackish water habitat within a purely marine environment remains unknown, and might constitute a new  
frontier in ocean sciences.

180 Human use of OFG could affect both fresh groundwater discharging into the ocean and groundwater  
hydraulic heads on land. FSGD has local ecological impacts on e.g. seagrass (Carruthers et al., 2005),  
corals (Oehler et al., 2019; Correa et al., 2021; Oberle et al., 2022), phytoplankton (Rodellas et al., 2015;  
Sugimoto et al., 2017; Waska and Kim, 2010), mollusc (Hwang et al., 2010), meio/macrofauna (Zipperle  
and Reise, 2005; Kotwicki et al., 2014; Grzelak et al., 2018) and fish populations (Fujita et al., 2019;  
Pisternick et al., 2020). These influences are often triggered by nutrient and carbon inputs into the  
185 submarine environment (Santos et al., 2021; Böttcher et al., 2022). Moreover, upward fluid migration  
within soft seafloor sediments might fluidize them, favouring the formation of pockmarks that potentially  
release greenhouse gases such as carbon dioxide and methane (Whiticar, 2002; Judd and Hovland, 2009;  
Donis et al., 2017; Virtasalo et al., 2019; Hoffmann et al., 2020). While some of these effects have been  
perceived as a threat for ecosystems, for instance by inducing toxic algal blooms, adding alkalinity (Cabral  
190 et al., 2021) or harbouring dense microbial communities (Ionescu et al., 2012), they can also sustain  
coastal ecology and increase fishery yields. Pumping OFG that is associated with FSGD could reduce the  
associated landward reservoirs and eventually impact the coastal marine environment. Moreover,  
anthropogenic intervention on coastal sediments might impact benthic-pelagic coupling associated with  
FSGD (von Ahn et al., 2021).

195

200 Considering the manifold biogeochemical impacts of FSGD, it is difficult to assess the overall effect of  
different pumping approaches and particular FSGD locations in local marine ecosystems, should a  
connected OFG be exploited. Pumping water from a groundwater system means reducing the formation  
pressure. The reduced pressure can communicate to the terrestrial aquifer and reduce the hydraulic head  
there (Yu and Michael, 2019b). The extent of this effect will depend on the reservoir properties as well  
as the hydraulic connectivity between terrestrial and offshore domain, which might in turn lead to SWI  
(Ferguson and Gleeson, 2012; Yu and Michael, 2019a), groundwater depletion (Bierkens and Wada,

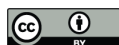

2019) and subsidence (Yu and Michael, 2019b). Despite the large uncertainties on the global and long-term effects of these changes for groundwater resources and associated marine ecosystems, lessons may be learned from the environmental effects of extensive oil exploration (Varma and Michael 2012; Chaussard et al., 2013).

Changes in FSGD volume and its chemical/biological composition could serve as an important indicator for changes in the coastal groundwater system, which could, in turn, also be caused by connectivity with OFG. FSGD can be a source of geochemical tracers (e.g. Ra and Rn; Kim and Hwang, 2002), inorganic nutrients (nitrate, phosphate and silicate; e.g. Waska et al., 2011; Szymczycha et al., 2012), trace metals (e.g. Knee and Paytan, 2011), climate-relevant trace gases (carbon dioxide, nitrous oxide, methane and carbon monoxide; e.g. Bugna et al., 1996; Chapelle and Bradley, 2007; Jurado et al., 2017; Kolker et al., 2021; Reading et al., 2021) and organic material (e.g. dissolved organic matter; see Kim and Kim (2017) and McDonough et al. (2022)) to coastal areas. The input of nutrients results in a FSGD-driven eutrophication of coastal areas and, thus, potentially affects coastal ecosystems (Luijendijk et al., 2020; Oehler et al., 2021; Santos et al., 2021). For example, the large *Ulva prolifera* outbreaks (green tides), which occur regularly off the coast of China, are attributed to the nutrient supply by FSGD (Liu et al., 2017; Zhao et al., 2021). Hence, sustained monitoring the biogeochemical and microbially-driven transformations of key biogeochemical tracers within the subterranean estuary as well as their release to the overlying water column, might help tracking changes in FSGD. Furthermore, such monitoring might also facilitate investigating potential impacts on the productivity and ecological status of coastal environments. Beyond coastal nearshore environments, FSGD seems to play an important role for biogeochemical fluxes to the ocean and affects benthic and sub-seafloor ecosystems in more offshore coastal areas (Micallef et al., 2021 and references therein). Therefore, a thorough investigation of its dynamics in different oceanic basins and geological settings should be performed by future studies.

Furthermore, FSGD and connected OFG could be increasingly affected by ongoing environmental changes on the terrestrial side namely climate change (e.g. by changing rain patterns or intensity; Thomas and Famiglietti, 2019), eutrophication (derived from increasing applications of fertilizers), urbanization of coastal areas and associated contamination with microplastics (Viaroli et al., 2022), chemical (e.g. pesticides, pharmaceuticals, and personal care products; see Knee and Paytan, 2011; Szymczycha et al., 2020) and biological pollutants (pathogenic germs such as bacteria and viruses; see e.g. Kyle et al., 2008; Sorensen et al., 2021). In particular, the effects of FSGD-driven inputs of chemical/biological pollutants on coastal areas remain largely unknown.

#### 4 Conceptual and technological approaches for assessing land-ocean groundwater connectivity

Various techniques are available to explore and identify FSGD and OFG in the offshore environment (e.g. Micallef et al., 2021) and groundwater resources on the land side (Kirsch, 2006). These techniques often reveal anomalies in the subsurface, the seafloor (e.g. pockmarks) or sea water column (e.g. salinity, geochemical tracers) associated with fresh groundwater. Often multiple techniques are applied to build confidence in interpretation of groundwater dynamics. The technologies used can be broadly categorized in four groups: *i*) geophysical imaging techniques, which detect/record physical parameters such as



245 electrical resistivity, seismic velocity, density, temperature or structural/morphological surface  
anomalies, *ii*) hydrogeological approaches, including modelling and hydrological measurements (e.g.  
hydraulic heads, salinity, and recharge rates) *iii*) (bio)geochemical techniques, which analyse  
(bio)geochemical fingerprints of the fluids, and *iv*) (micro)biological sampling, which unravels biological  
250 researchers within different disciplinary backgrounds including geophysics, hydrology, oceanography  
and biogeochemistry.

Assessing land-ocean hydraulic connectivity through groundwater requires investigating the connectivity  
of underlying lithologic units and their hydrological characterization. Moreover, it also requires  
255 identifying the current distribution of freshened groundwater bodies across the coast line. The occurrence  
of freshened groundwater along the onshore-offshore continuum may in turn be read from geochemical  
fingerprinting of fluid samples obtained from the different realms. Hence, the success of such a highly  
interdisciplinary endeavour in mapping and understanding the connectivity will depend on how well the  
different methodologies can be integrated. Here, we suggest overarching approaches in which synergies  
260 (both conceptual and technological) between FSGD and OFG scientific communities could contribute to  
an improved understanding of the dynamics of groundwater as a connecting path between land and the  
ocean at the coastal zone. Table 2 presents some of the most commonly used methods in groundwater  
studies, for which we foresee promising synergies between FSGD and OFG research.

#### 265 *Shoreline-crossing lithologies*

Seismic reflection imaging is the method of choice for detailed subsurface mapping. Particular lithologies  
may be identified by the character of the seismic reflection data within a lithological unit, e.g. layered  
seismic facies for fine-grained marine sediments vs. chaotic patterns for coarser grained sediments  
(Thomas et al., 2019; Micallef et al., 2020). Co-located boreholes on seismic sections can greatly improve  
270 the identification of different facies and serve as calibration points along those sections. Of particular  
importance for shoreline-crossing groundwater dynamics is the possibility of seismic data to constrain  
the continuity of different lithological units, the presence of impermeable clay layers and faults, or other  
disrupting geological structures. However, seismic information in the transition zone near the coastline is  
not widely available due to logistical challenges for data acquisition. Land and marine seismic data have  
275 inherently different signal-to-noise ratios and imaging depths, making across-shoreline interpretation  
challenging. On land there are often more boreholes than offshore, which can provide data to constrain  
the lithology distribution. Through the integration of onshore and offshore seismic and borehole data  
using geostatistical methods such as sequential indicator simulation or multiple point geostatistics  
(Deutsch and Pyrcz 2014), lithology distribution across the shoreline can be modelled to reduce the  
280 uncertainty of connected pathways between the terrestrial and offshore domains.

Land and marine seismic data require different seismic sources, e.g. vibroseis on land and  
airguns/sparkers at sea, and receivers. Noise levels are generally higher on land, whereas offshore imaging  
in the transition zone is hampered by seafloor multiple reflections due to the shallow water depth.  
285 Generally, clastic sedimentary environments are easier to image than carbonate systems (e.g. Mountain,  
2008; Lofi et al., 2013; Bertoni et al., 2020). Amphibious data acquisition, i.e. across the shoreline, is



possible and can be accomplished in different ways, for instance by shooting on land and receiving at sea or vice versa. Yet, due to logistical challenges and greater expenses, amphibious sections are not a standard. In karstic carbonate or volcanic systems, the spatial occurrence of localised submarine springs  
290 (rather than the diffuse discharge in siliciclastic systems) can help to characterise the onshore-offshore connectivity of aquifers (Bayari et al., 2011).

Ground penetrating radar (GPR) is suitable for detailed, near-surface lithological imaging on land. The GPR technique is based on an electromagnetic signal that is sensitive to sediment water content. Offshore,  
295 hydroacoustic and seismic methods provide structural information from shallow to larger depth, but are insensitive to the water content. However, unconformable boundaries of subsurface sediment units are typically imaged as strong reflectors in both GPR and reflection seismic profiles due to the associated sharp changes in water content and density, respectively, which permits the cross-shore correlation of onshore GPR profiles with marine seismic profiles using the allostratigraphic approach (see e.g. Virtasalo  
300 et al., 2019; Peterson et al., 2020).

#### Identification of ground water bodies

While seismic data can reveal the geological background and are -to some extent- sensitive to the porosity of the rock, they contain no information on pore fluid salinity. The salinity of pore fluids can be explored  
305 using electrical methods because the bulk electrical resistivity of a sediment rock is governed by the amount (fluid-saturated pore space) and salinity of fluid present (Archie, 1942; Keller, 1987). The better the porosity of the lithology is known, for example through seismic/lithological data, the better the pore space fluid saturation on land and the pore water salinity offshore can be assessed from bulk electrical resistivity measurements. A bulk electrical resistivity model of the subsurface can be derived from either  
310 direct or alternating current electrical measurements (electromagnetic induction), where the latter allows for larger penetration depths and better resolution offshore.

On land, the highest data acquisition speed and therefore the largest areal coverage is achieved through airborne electromagnetic methods (e.g. Bedrosian et al., 2016; Gottschalk et al., 2020; Siemon et al.,  
315 2020). Additional ground measurements using direct current and controlled source electromagnetic methods provide bulk electrical resistivity model of the subsurface at higher resolution and larger depths of penetration (e.g. Pondthai et al., 2020). Resolution in surveys of electrical resistivity on land can be augmented by conducting GPR surveys. GPR methods allow both detecting contrasts in the electrical conductivity structure (dielectric constant) contained in coastal sediments at high resolution (cm to m  
320 scales), and effectively mapping the freshwater-saltwater interface at shallow depths (up to tens of m; Weymer et al., 2020).

Offshore, a freshened groundwater body offshore can be identified as an electrical resistivity anomaly caused by the resistivity contrast between fresh and saline pore water. The conductive saline ocean above  
325 the seafloor strongly damps electromagnetic signals which renders airborne electromagnetic systems incapable of penetrating the seafloor at water depths larger than about 10–20 m (Goebel et al., 2019). Therefore, offshore measurements require specially adapted marine electromagnetic systems. So far, OFG exploration studies have been conducted using surface-towed (e.g. Gustafson et al., 2019; Attias et al.,





2021) and/or seafloor-towed (Haroon et al., 2018; 2021; Micallef et al., 2020) systems. Both systems  
330 consist of a horizontal electric source dipole followed by several electric receiving dipoles recording the  
inline electric field. Offsets between transmitter and receiving dipoles typically range can between  
hundreds and several hundreds of meters, and can be adjusted according to the target depth. Sea surface-  
towed systems have the advantage of a greater acquisition speed, yet at the cost of lower resolution and  
larger source dipole moments (current amplitude times dipole length) required to compensate for the  
335 decay of the source signal in the conductive ocean layer. Seafloor-towed systems have arguably better  
signal to noise ratios and resolution, although survey speed is much lower, and surveying is hampered by  
rough seafloor topography and infrastructure. Onshore-offshore acquisition with a land transmitter and  
offshore receiver is possible (Ishizu and Ogawa, 2021). However, to date there are no peer-reviewed  
published studies which use this approach. Merging of a separately acquired onshore-offshore electrical  
340 resistivity section with land and marine systems is possible, although a coherent continuous picture may  
be hampered by different resolutions, penetration depths, noise levels and the strong 3D resistivity  
contrast at the shoreline (“coast effect”; Worzewski et al. (2012)). Recently, joint land/water data  
inversion methods have become available to amend that deficit (Hermans and Paepen, 2020).  
Furthermore, conversion of electrical resistivity sections to water saturation on land or pore water salinity  
345 (the actual target parameters), requires integration of lithological data, i.e. bulk porosity estimates and an  
appropriate choice of effective medium model.

In-situ sampling techniques are effective and simple, albeit labour- and time-intensive ways to detect  
freshened groundwater. These methods include pore water extraction using push-point samplers along  
350 transects or grids (Waska et al., 2019), in-situ detection of springs with infrared cameras (Röper et al.,  
2014), and collection of seeping groundwater with seepage meters or benthic chambers (e.g. Lee 1977,  
Donis et al., 2017). Although mostly applied to nearshore groundwater discharge, all above-mentioned  
methods are adaptable to remote systems, for instance on stationary landers or ROVs (e.g. Ahmerkamp  
et al., 2017).

### 355 Groundwater flow

Imaging of coastal aquifers using inversion of geophysical data constrained by groundwater transport  
simulations is a promising method which might greatly reduce uncertainty in FSGD rates and location  
(Costall et al., 2020). Other promising approaches to detect FSGD over a larger area (tens of kilometres)  
360 while also allowing an assessment of its temporal variability, are thermal radiance measurements with  
manned (e.g. Roxburgh, 1985; Johnson et al., 2008) or unmanned (e.g. Fischer et al., 1964; Dulai et al.,  
2016; Lee et al., 2016; Mallast and Siebert, 2019) aerial and sea-going vehicles.

While geophysical methods provide the geological background and current state of onshore-offshore  
365 groundwater distribution (Weymer et al., 2015), they do not capture the dynamics and functioning of the  
system which are essential to determining and understanding the nature of land-sea hydrologic  
connectivity. Physical hydrological measurements are essential for understanding groundwater flow rates  
and patterns. In coastal systems with variations in fluid density, this involves characterizing groundwater  
head distributions and associated hydraulic gradients, as well as the salinity distributions. On land, this is  
370 typically done with measurements from groundwater wells in addition to geophysics. Offshore, these



375 measurements are more challenging but provide critical information on the forces driving fluid flow  
through the onshore-offshore system. Because offshore hydrologic data is generally sparse, groundwater  
modelling is an essential tool to test hypotheses about system function given the geological, hydrological,  
and biogeochemical data available. Groundwater models that incorporate physics-based variable-density  
380 flow and salt transport, and capture the essential characteristics of the system (e.g. interconnection of  
geologic strata; Michael et al., 2016; Thomas et al., 2022), can be used to understand the long-timescale  
evolution of OFG systems towards their current state (e.g. Cohen et al., 2010; Micallef et al., 2020;  
Zamrsky et al., 2020), and to predict changes under expected changes in sea level and anthropogenic  
forcing (Yu and Michael, 2019a; 2019b). These models can not only characterize the flow in the  
385 subsurface, but also characterize the rate and distribution of FSGD and/or diffusive transport processes.

In conjunction with geophysical and hydrological data and analyses, the geochemistry of groundwater  
fluid samples can provide key information about the origin and age of FSGD and OFG. A combination  
of stable isotope and conservative tracer analysis (e.g. Hoefs, 2009; Dang et al., 2020) can be used to  
385 identify sources and estimate ages of offshore groundwater bodies, i.e. recent or fossil meteoric water  
(van Geldern et al., 2013), glacial meltwater (Hong et al., 2019) or methane hydrate dissociation  
(Dählmann and De Lange, 2003). While onshore fluid samples required for this analysis are relatively  
easily obtained (typically from groundwater observation wells), OFG fluid sample collection requires in-  
situ sampling at depth through a borehole or, if existing, knowledge of FSGD occurrences on the seafloor.  
390 FSGD sites on the seafloor can be identified through identification of morphologic depressions  
(pockmarks, sinkholes) through high frequency acoustic seafloor bathymetry mapping and identification  
of anomalous seafloor fauna and flora associated with a change in water salinity and nutrients input (e.g.  
Lecher and Mackey, 2018; Archana et al., 2021). Other approaches used to search FSGD sites on a  
regional scale include mapping radiogenic isotopes that are associated with groundwater (Burnett, 2006;  
395 Paldor et al., 2020), shallow physical imaging of resistivity anomalies, survey of small-scale magnetic  
susceptibility anomalies caused by preservation or diagenetic alteration of iron oxides in sediments  
(Müller et al., 2011), satellite infrared imagery using e.g. Landsat 8 - infrared (e.g. Wilson and Rocha,  
2012; Schubert et al., 2014; Jou-Claus et al. 2021), and surface reaching fault mapping by seismic  
400 methods.

FSGD may also cause measurable anomalies in the deeper water column of offshore sites (Manheim,  
1967; Attias et al., 2021). While temperature and salinity anomalies are only measurable in the immediate  
vicinity of the FSGD location and may be obscured by natural variations in water temperature and by  
tidal currents, Radon and Radium anomalies can be traced to larger distances (e.g. Cable et al., 1996;  
405 Moore et al., 2011). This methodology works well in areas of diffuse and uniform FSGD, but it might  
overlook localized point sources, which can account for up to 90% of FSGD in karstic regions (Null et  
al., 2014).

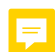

## 5 Future research directions

410 In view of the increasing pressure of human activities and natural changes on groundwater resources, the  
fundamental role of land-ocean connectivity through groundwater on the dynamics of coastal systems



requires a critical reassessment. FSGD and the associated fluxes of biogeochemical tracers might affect the physical structure, chemical composition and reactivity and the (micro)biology of the coastal ocean ecosystems. Global and regional environmental changes (i.e. warming, eutrophication, acidification, pollution) modify processes in coastal groundwater and thereby FSGD, with largely unknown consequences for coastal marine ecosystems. Exploitation of OFG connected to terrestrial groundwater is expected to impact terrestrial groundwater flow systems. These feedback mechanisms operate over a wide range of spatial and temporal scales, ranging from molecular to global and from millisecond to millennial. Thus, an overarching goal of future coastal groundwater research should aim to develop a suite of ecosystem models of land-ocean connectivity that include physical, geological, chemical and biological processes at play, and that address potential responses to dynamic interactions between nature and humans.

425 Within this framework, we recommend the following priority research tasks:

(1) assess and compare the spatio-temporal variability of physical and biogeochemical processes driving the dynamics of FSGD and OFG in different geological settings,

430 (2) characterize and quantify the geochemical/biological composition of FSGD and OFG, as well as its impacts on marine habitats and (micro)biological communities,

(3) develop an interdisciplinary framework including hydrological, geophysical, geochemical and (micro)biological and measurements to delineate groundwater fluxes (FSGD) and map reservoirs (OFG) along the transition from nearshore to offshore systems,

435 (4) use numerical models and artificial intelligence to predict locations, magnitudes and connectivity of FSGD and OFG,

440 (5) characterize the stratigraphy at the land-ocean interface to determine the potential for development of connected, active OFG systems, and

(6) identify, quantify, and predict feedbacks between coastal groundwater dynamics and climate change to assess potential changes in volume and composition of FSGD and OFG.

445 Investigation of the land-ocean connectivity through groundwater beyond nearshore FSGD remains especially challenging because of its limited accessibility and large heterogeneity. Its future study will require representative and standardized sampling, the development of new analytical methods (e.g., in-situ offshore groundwater measurements), and new observational and experimental frameworks. These endeavours should facilitate fully representative parameterizations of FSGD-OFG connectivity in numerical models across the land-sea interface. Moreover, developing hydrologic/oceanographic models of coastal and offshore groundwater and its interactions with other system compartments (sediments, water column, seafloor environments) will help predicting future changes of groundwater on both regional and global scales.



455

It is evident that only multidisciplinary research initiatives, at both local, national and international levels, can effectively address the research tasks identified in this perspective paper. Joint projects should link laboratory, field, and modelling approaches to better understand the complex interplay of the various physical, chemical and biological processes operating along the land-ocean interface. Likewise, sustained observations will help to amend the current uncertainties in temporal variability of groundwater flows. An improved understanding of land-ocean connectivity in this context will contribute to our appreciation of the crucial role of coastal groundwater in societal-relevant issues such as climate change, pollution and the overall environmental status of the coastal oceans. Future research efforts in this topic will directly address the Sustainable Development Goals 6 (“*Clean water and sanitation*”), 12 (“*Responsible consumption and production*”) and 14 (“*Life below water*”) of the United Nations (see <https://www.un.org/sustainable-development/sustainable-development-goals/>).

460

465

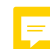

#### **Author contributions**

The initial draft of this perspectives manuscript was prepared by D.L.A.M., A.H., H.W.B, E.E., M.J., N.M. and J.S.v.D. All co-authors contributed to the revision and preparation of the final version of the manuscript.

470

#### **Competing interests**

The authors declare that they have no conflict of interest.

475

#### **Acknowledgements**

The manuscript is a contribution to the KiSNet Network funded by the German Research Foundation (DFG; Grant # MA7041/6-1) and the DFG research training group Baltic TRANSCOAST. A.M. has received funding from the European Research Council (ERC) under the European Union’s Horizon 2020 research and innovation programme (grant agreement No 677898 (MARCAN)). The conception of this manuscript was fostered by the discussions during a workshop sponsored by the Future Ocean Network of Kiel University (<https://www.futureocean.org/en/>) in February 2021. D.L.A.M. is supported by the Future Ocean Network (Grant # FON2020-03).

480

#### **Dedication**

*This article is dedicated to Dr. Volker Liebetrau (1965–2022). Volker, our co-author and friend, passed away on February 7<sup>th</sup> 2022. Volker is remembered for his enthusiasm, commitment, and smile. His passing is a massive loss to the community, but there will be much that will still be carried on in his memory thanks to his hard work and passion.*

490

#### **References**

Abbott, B. W., Bishop, K., Zarnetske, J. P., Minaudo, C., Chapin, F. S., Krause, S., Hannah, D. M., Conner, L., Ellison, D., Godsey, E. S., Plont, S., Marçais, J., Kolbe, T., Huebner, A., Frei, R. J., Hampton, T., Gu, S., Buhman, M., Sara Sayedi, S., Ursache, O., Chapin, M., Henderson, K. D., and Pinay, G.:

495



- Human domination of the global water cycle absent from depictions and perceptions, *Nat. Geosci.*, 12, 533–540, 2019.
- Adyasari, D., Hassenrück, C., Oehler, T., Sabdaningsih, A., and Moosdorf, N.: Microbial community structure associated with submarine groundwater discharge in northern Java (Indonesia), *Sci. Total Environ.*, 689, 590–601, 2019.
- Ahmerkamp, S., Winter, C., Krämer, K., Beer, D. d., Janssen, F., Friedrich, J., Kuypers, M. M. M., and Holtappels, M.: Regulation of benthic oxygen fluxes in permeable sediments of the coastal ocean, *Limnol. Oceanogr.*, 62, 1935–1954, <https://doi.org/10.1002/lno.10544>, 2017.
- Archana, A., Francis, C. A., and Boehm, A. B.: The Beach Aquifer Microbiome: Research Gaps and Data Needs, *Front. Environ. Sci.*, 9, 653568, doi: 10.3389/fenvs.2021.653568, 2021.
- Archie, G.E.: The Electrical Resistivity Log as an Aid in Determining Some Reservoir Characteristics, *Transactions of AIME*, 146, 54–62, 1942.
- Attias, E., Constable, S., Sherman, D., Ismail, K., Shuler, C., and Dulai, H.: Marine electromagnetic imaging and volumetric estimation of freshwater plumes offshore Hawai'i, *Geophys. Res. Lett.*, 48, e2020GL091249, <https://doi.org/10.1029/2020GL091249>, 2021.
- Bakken, T. H., Ruden, F., and Mangset, L. E.: Submarine groundwater: A new concept for the supply of drinking water, *Water Resour. Manag.*, 26(4), 1015–1026, <https://doi.org/10.1007/s11269-011-9806-1>, 2012.
- Bayari, C. S., Ozyurt, N. N., Oztan, M., Bastanlar, Y., Varinlioglu, G., Koyuncu, H., et al.: Submarine and coastal karstic groundwater discharges along the southwestern Mediterranean coast of Turkey, *Hydrogeol. J.*, 19(2), 399–414, <https://doi.org/10.1007/s10040-010-0677-y>, 2011.
- Bedrosian, P. A., Schamper, C., and Auken, E.: A comparison of helicopter-borne electromagnetic systems for hydrogeologic studies, *Geophys. Prospect.*, 64, doi:10.1111/1365-2478.12262, 2016.
- Beebe, D. A., Huettmann, M. B., Webb, B. M., and Jackson, W. T. Jr.: Atmospheric groundwater forcing of a subterranean estuary: A seasonal seawater recirculation process, *Geophys. Res. Lett.*, 49, e2021GL096154, <https://doi.org/10.1029/2021GL096154>, 2022.
- Bertoni, C., Lofi, J., Micallef, A., and Moe, H.: Seismic reflection methods in offshore groundwater research, *Geosciences*, 10(8), 299, 2020.
- Bierkens, M. F. P., and Wada, Y.: Non-renewable groundwater use and groundwater depletion: a review, *Environ. Res. Lett.*, 14, 063002, 2019.

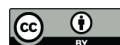

- 540 Böttcher, M. E., Mallast, U., Massmann, G., Moosdorf, N., Müller-Petke, M., and Waska, H.: Coastal-Groundwater interfaces (submarine groundwater discharge). In (Krause, S., ed.) *Ecohydrological Interfaces*, Wiley Science, in press, 2022.
- Bratton, J. F.: The Three Scales of Submarine Groundwater Flow and Discharge across Passive Continental Margins, *The Journal of Geology*, 118, 565–575, 2010.
- 545 Bugna, G., Chanton, J. P., Young, J. E., Burnett, W. C., and Cable, P. H.: The importance of groundwater discharge to the methane budgets of nearshore and continental shelf waters of the northeastern Gulf of Mexico, *Geochim. Cosmochim. Acta* 60, 4735–4746, doi: 10.1016/S0016-7037(96)00290-6, 1996.
- 550 Burnett, W. C., Aggarwal, P. K., Aureli, A., Bokuniewicz, H., Cable, J. E., Charette, M. A., Kontar, E., Krupa, S., Kulkarni, K. M., Loveless, A., Moore, W. S., Oberdorfer, J. A., Oliveira, J., Ozyurt, N., Povinec, P., Privitera, A. M. G., Rajar, R., Ramassur, R. T., Scholten, J., Stieglitz, T., Taniguchi, M., and Turner, J. V.: Quantifying submarine groundwater discharge in the coastal zone via multiple methods, *Sci. Total Environ.*, 367(2–3), 498–543, 2006.
- 555 Cable, J. E., Burnett, W. C., Chanton, J. P., and Weatherly, G. L.: Estimating groundwater discharge into the northeastern Gulf of Mexico using radon-222, *Earth Plan. Sci. Lett.*, 144(3–4), [https://doi.org/10.1016/S0012-821X\(96\)00173-2](https://doi.org/10.1016/S0012-821X(96)00173-2), 1996.
- 560 Cabral, A., Dittmar, T., Call, M., Scholten, J., de Rezende, C. E., Asp, N., Gledhill, M., Seidel, M., and Santos, I. R.: Carbon and alkalinity outwelling across the groundwater-creek-shelf continuum off Amazonian mangroves, *Limnol. Oceanogr. Lett.*, 6, 369–378, 2021.
- 565 Carruthers, T. J. B., van Tussenbroek, B. I., and Dennison, W. C.: Influence of submarine springs and wastewater on nutrient dynamics of Caribbean seagrass meadows, *Estuar. Coast. Shelf S.*, 64(2–3), 191–199, 2005.
- Chapelle, F. H., and Bradley, P. M.: Hydrologic significance of carbon monoxide concentrations in groundwater, *Groundwater*, 45, 272–280, 2007.
- 570 Chaussard, E., Amelung, F., Abidin, H., and Hong, S.-H.: Sinking cities in Indonesia: ALOS PALSAR detects rapid subsidence due to groundwater and gas extraction, *Remote Sens. Environ.*, 128, 150–161, <https://doi.org/10.1016/j.rse.2012.10.015>, 2013.
- 575 Chen, C.-T., Hu, J.-C., Lu, C.-Y., Lee, J.-C., and Chan, Y.-C.: Thirty-year land elevation change from subsidence to uplift following the termination of groundwater pumping and its geological implications in the Metropolitan Taipei Basin, Northern Taiwan, *Eng. Geol.*, 95, 30–47, 2007.
- Church, T.M.: A groundwater route for the water cycle, *Nature*, 380, 579–580, 1996.

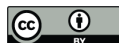

- 580 Church, J.A., Clark, P. U., Cazenave, A., Gregory, J. M. et al.: Sea Level Change. In: Climate Change 2013: The Physical Science Basis. Contribution of Working Group I to the Fifth Assessment Report of the Intergovernmental Panel on Climate Change [Stocker, T.F., D. Qin, G.-K. Plattner, M. Tignor, S.K. Allen, J. Boschung, A. Nauels, Y. Xia, V. Bex and P.M. Midgley (eds.)], 1137–1216. Cambridge University Press, Cambridge, United Kingdom and New York, NY, USA.
- 585 Cohen, D., Person, M., Wang, P., Gable, C. W., Hutchinson, D., Marksamer, A., et al: Origin and extent of fresh paleowaters on the Atlantic continental shelf, USA, *Groundwater*, 48(1), 143–158, 2010.
- 590 Correa, R. E., Cardenas, M. B., Rodolfo, R. S., Lapus, M. R., Davis, K. L., Giles, A. B., Fullon, J. C., Hajati, M.-C., Moosdorf, N., Sanders, C. J., and Santos, I.R.: Submarine Groundwater Discharge Releases CO<sub>2</sub> to a Coral Reef, *ACS ES&T Water*, 1(8), 1756–1764, 2021.
- 595 Costall, A. R., Harris, B. D., Teo, B. et al.: Groundwater Throughflow and Seawater Intrusion in High Quality Coastal Aquifers, *Sci. Rep.*, 10, 9866, <https://doi.org/10.1038/s41598-020-66516-6>, 2020.
- Dählmann, A., and de Lange, G. J.: Fluid-sediment interactions at Eastern Mediterranean mud volcanoes: A stable isotope study from ODP Leg 160. *Earth Plan. Sci. Lett.*, 212(3–4), 377–391, [https://doi.org/10.1016/S00127821X\(03\)002279](https://doi.org/10.1016/S00127821X(03)002279), 2003.
- 600 Dang, X., Gao, M., Wen, Z., Jakada, H., Hou, G., and Liu, S.: Evolutionary process of saline groundwater influenced by palaeo-seawater trapped in coastal deltas: A case study in Luanhe River Delta, China, *Estuar. Coast. Shelf S.*, 244, 106894, <https://doi.org/10.1016/j.ecss.2020.106894>, 2020.
- 605 Deutsch, C. V., and Pyrcz, M. In: Pyrcz M. J., and Deutsch C. V. (eds.) *Geostatistical reservoir modeling*, 2<sup>nd</sup> edn., Oxford University Press, Oxford, 448 p., 2014.
- 610 Donis, D., Janssen, F., Liu, B., Wenzhöfer, F., Dellwig, O., Escher, P., Spitzky, A., and Böttcher, M.E.: Biogeochemical impact of submarine ground water discharge on coastal surface sands of the southern Baltic Sea, *Est. Coast. Shelf Res.*, 189, 131–142, 2017.
- Dulai, H., Kamenik, J., Waters, C. A., Kennedy, J., Babinec, J., Jolly, J., et al.: Autonomous long-term gamma-spectrometric monitoring of submarine groundwater discharge trends in Hawaii, *J. Radioanal. Nucl. Chem.*, 307, 1865–1870, doi: 10.1007/s10967-015-4580-9, 2016.
- 615 Ferguson, G., and Gleeson, T.: Vulnerability of coastal aquifers to groundwater use and climate change. *Nature Clim. Change*, 2, 342–345, <https://doi.org/10.1038/nclimate1413>, 2012.
- 620 Fischer, W. A., Landis, G. H., Moxham, R. M., and Polcyn, F.: Infrared Surveys of Hawaiian Volcanoes - Aerial Surveys with Infrared Imaging Radiometer Depict Volcanic Thermal Patterns + Structural Features, *Science*, 146(364), 733–742, 1964.

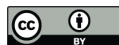

- 625 Fujita, K., Shoji, J., Sugimoto, R., Nakajima, T., Honda, H., Takeuchi, M., Tominaga, O., and Taniguchi, M.: Increase in Fish Production Through Bottom-Up Trophic Linkage in Coastal Waters Induced by Nutrients Supplied via Submarine Groundwater, *Front. Environ. Sci.*, 7(82), <https://doi.org/10.3389/fenvs.2019.00082>, 2019.
- 630 Goebel, M., Knight R., and Halkjaer, M.: Mapping saltwater intrusion with an airborne electromagnetic method in the offshore coastal environment, Monterey Bay, California, *J. Hydrol.: Reg. Stud.*, 23, <https://doi.org/10.1016/j.ejrh.2019.100602>, 2019.
- Gottschalk, I., Knight, R., Asch, T., Abraham, J., and Cannia J.: Using an airborne electromagnetic method to map saltwater intrusion in the northern Salinas Vallet, California, *Geophysics*, 85 (4), B119–B131, <https://doi.org/10.1190/geo2019-0272.1>, 2020.
- 635 Grzelak, K., Tamborski, J., Kotwicki, L., and Bokuniewicz, H.: Ecostructuring of marine nematode communities by submarine groundwater discharge, *Mar Environ. Res.*, 136, 106–119, doi: 10.1016/j.marenvres.2018.01.013, 2018.
- 640 Gustafson, C., Key, K., and Evans, R. L.: Aquifer systems extending far offshore on the U.S. Atlantic margin, *Scientific Reports*, 9(1), 8709, <https://doi.org/10.1038/s41598-019-44611-7>, 2019.
- 645 Haroon, A., Lippert, K., Mogilatov, V., and Tezkan, B.: First application of the marine differential electric dipole for groundwater investigations: A case study from Bat Yam, Israel, *Geophysics*, 83(2), B59–B76, 2018.
- Haroon, A., Micallef, A., Jegen, M., Schwalenberg, K., Karstens, J., Berndt, C., et al.: Electrical resistivity anomalies offshore a carbonate coastline: Evidence for freshened groundwater? *Geophys. Res. Lett.*, 48, e2020GL091909, <https://doi.org/10.1029/2020GL091909>, 2021.
- 650 Hermans, T., and Paepen, M.: Combined inversion of land and marine electrical resistivity tomography for submarine groundwater discharge and saltwater intrusion characterization, *Geophys. Res. Lett.*, 47, e2019GL085877, <https://doi.org/10.1029/2019GL085877>, 2020.
- 655 Hoefs, J.: *Stable isotope geochemistry*, 203 p., Springer, Berlin/Heidelberg, 2009.
- Hoffmann, J. J. L., Schneider von Deimling, J., Schröder, J., Schmidt, M., Scholten, J., Crutchley, G. J., Gorman, A. R.: Complex eyed pockmarks and submarine groundwater discharge revealed by acoustic data and sediment cores in Eckernförde Bay, SW Baltic Sea, *Geochem. Geophys. Geosy.*, 21(4), <https://doi.org/10.1029/2019GC008825>, 2020.
- 660 Hong, W.-L., Lepland, A., Himmler, T., Kim, J. H., Chand, S., Sahy, D., et al.: Discharge of meteoric water in the eastern Norwegian Sea since the last glacial period, *Geophys. Res. Lett.*, 46, 8194–8204, <https://doi.org/10.1029/2019GL084237>, 2019.



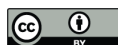

- 665 Hwang, D. W., Kim, G., Lee, W. C., and Oh, H. T.: The role of submarine groundwater discharge (SGD) in nutrient budgets of Gamak Bay, a shellfish farming bay, in Korea, *J. Sea Res.*, 64(3), 224–230, 2010.
- Ionescu, D., Siebert, C., Polerecky, L., Munwes, Y. Y., Lott, C., et al.: Microbial and Chemical Characterization of Underwater Fresh Water Springs in the Dead Sea, *PLoS ONE*, 7(6), e38319, 670 <https://doi:10.1371/journal.pone.0038319>, 2012.
- Ishizu, K., and Ogawa, Y.: Offshore-onshore resistivity imaging of freshwater using a controlled-source electromagnetic method: A feasibility study, *Geophysics*, 86, E391–E405, 675 <https://doi.org/10.1190/geo2020-0906.1>, 2021.
- Jiao, J., and Post, V.: *Coastal Hydrogeology*. Cambridge: Cambridge University Press. doi:10.1017/9781139344142, 2019.
- Johnson, A. G., Glenn, C. R., Burnett, W. C., Peterson, R. N., and Lucey, P. G.: Aerial infrared imaging 680 reveals large nutrient-rich groundwater inputs to the ocean, *Geophys. Res. Lett.*, 35(15), 6, 2008.
- Jou-Claus, S., Folch, A., and Garcia-Orellana, J.: Applicability of Landsat 8 thermal infrared sensor for identifying submarine groundwater discharge springs in the Mediterranean Sea basin, *Hydrol. Earth Syst. Sci.*, 25, 4789–4805, <https://doi.org/10.5194/hess-25-4789-2021>, 2021. 685
- Judd, A., and Hovland, M.: *Seabed fluid flow: The impact on geology, biology and the marine environment*, 492 p., Cambridge, Cambridge University Press, 2009.
- Jurado, A., Borges, A. V., and Brouyère, S.: Dynamics and emissions of N<sub>2</sub>O in groundwater: A review, 690 *Sci. Total Environ.*, 584–585, 207–218, 2017.
- Jurasinski, G., Janssen, M., Voss, M., Böttcher, M. E., Brede, M., Burchard, H., Forster, S., Gosch, L., Gräwe, U., Gründling-Pfaff, S. et al.: Understanding the Coastal ecocline: Assessing sea-land-interactions at non-tidal, low-lying coasts through interdisciplinary research, *Front. Mar. Sciences*, 5(342), 1–22, doi: 695 [10.3389/fmars.2018.00342](https://doi.org/10.3389/fmars.2018.00342), 2018.
- Keller, G. V.: *Rock and Mineral Properties*, in: *Electromagnetic Methods in Applied Geophysics*, M. Nabighian (ed.), 1, II. Series: *Investigations in Geophysics*, SEG. ISBN 1-56080-069-0, 1987.
- 700 Kim, G., and Hwang, D.-W.: Tidal pumping of groundwater into the coastal ocean revealed from submarine <sup>222</sup>Rn and CH<sub>4</sub> monitoring, *Geophys. Res. Lett.*, 29(14,1678), [10.1029/2002GL015093](https://doi.org/10.1029/2002GL015093), 2002.
- Kim, J., and Kim, G.: Inputs of humic fluorescent dissolved organic matter via submarine groundwater discharge to coastal waters off a volcanic island (Jeju, Korea), *Scientific Reports*, 7(7921), [10.1038/s-41598-017-08518-5](https://doi.org/10.1038/s-41598-017-08518-5), 2017. 705



- Kirsch, R., (Ed), *Groundwater Geophysics, A Tool for Hydrogeology*, Springer ISBN 10 3-540-29383-3, 2006.
- 710 Knee, K. L. and Paytan, A.: Submarine Groundwater Discharge: A source of nutrients, metals, and pollutants to the coastal ocean. In: Wolanski E and McLusky DS (eds.) *Treatise on Estuarine and Coastal Science*, Vol 4, pp. 205–233, Waltham: Academic Press, 2011.
- Kohout, F. A.: The flow of fresh water and salt water in the Biscayne Bay Aquifer of the Miami area, Florida. In: Cooper, H. H., Kohout, F. A., Henry, H. R., and Glover, R. E. (Eds.), *Sea Water in Coastal Aquifers*. Geological survey water-supply paper, 1613-C, USGS, Washington, D.C., pp. 12–32, 1964.
- 715
- Kolker, D., Bookman, R., Herut, B., David, N., and Silverman, J.: An initial assessment of the contribution of fresh submarine ground water discharge to the alkalinity budget of the Mediterranean Sea, *J. Geophys. Res. Oceans*, 126, e2020JC017085, <https://doi.org/10.1029/2020JC017085>, 2021.
- 720
- Konikow, L. F.: Contribution of global groundwater depletion since 1900 to sea-level rise, *Geophys. Res. Lett.*, 38(17), 2011.
- 725
- Kooi, H., and Groen, K.: Offshore continuation of coastal groundwater systems; predictions using sharp-interface approximations and variable-density flow modelling, *J. Hydrol.*, 246(1–4), 19–35, [https://doi.org/10.1016/S0022-1694\(01\)00354-7](https://doi.org/10.1016/S0022-1694(01)00354-7), 2001.
- Kotwicki, L., Grzelak, K., Czub, M., Dellwig, O., Gentz, T., Szymczycha, B., and Böttcher, M. E.: Submarine groundwater discharge to the Baltic coastal zone: Impacts on the meiofaunal community, *J. Mar. Sys.*, 129, 118–126, 2014.
- 730
- Kyle, J., Eydal, H., Ferris, F. et al.: Viruses in granitic groundwater from 69 to 450 m depth of the Äspö hard rock laboratory, Sweden. *ISME J.*, 2, 571–574, <https://doi.org/10.1038/ismej.2008.18>, 2008.
- 735
- Lecher, A., and Mackey, K.: Synthesizing the effects of submarine groundwater discharge on Marine Biota, *Hydrology*, 5:60, doi: 10.3390/hydrology5040060, 2018.
- Lee, D. R.: A device for measuring seepage flux in lakes and estuaries, *Limnol. Oceanogr.*, 22(1), 140–147, 1977.
- 740
- Lee, E., Yoon, H., Hyun, S. P., Burnett, W. C., Koh, D. C., Kang, K. M., et al.: Unmanned aerial vehicles (UAVs)-based thermal infrared (TIR) mapping, a novel approach to assess groundwater discharge into the coastal zone, *Limnol. Oceanogr.* 14, 725–735, doi: 10.1002/lom3.10132, 2016.
- 745



- Leitão, F., Encarnação, J., Range, P., Schmelz, R. M., Teodósio, M.A., and Chícharo, L.: Submarine groundwater discharges create unique benthic communities in a coastal sandy marine environment, *Estuar. Coast. Shelf S.*, 163, 93–98, 2015.
- 750 Lofi, J., Pezard, P., Bouchette, F., Raynal, O., Sabatier, P., Denchik, N., et al.: Integrated onshore-offshore investigation of a Mediterranean layered coastal aquifer, *Groundwater*, 51(4), 550–561, 2013.
- Liu, K.-K., Atkinson, L., Quiñones, R., and Talaue-McManus, L. (eds.): Carbon and nutrient fluxes in continental margins: A global synthesis, Berlin & Heidelberg, 741 pp., 2010.
- 755 Liu, J., Su, N., Wang, X., and Du, J.: Submarine groundwater discharge and associated nutrient fluxes into the Southern Yellow Sea: A case study for semi-enclosed and oligotrophic seas - implication for green tide bloom, *J. Geophys. Res. Oceans*, 122, 139–152, doi:10.1002/2016JC012282, 2017
- Luijendijk, E., Gleeson, T., and Moorsdorf, N.: Fresh groundwater discharge insignificant for the world's oceans but important for coastal ecosystems, *Nat. Com.*, 11(1260), <https://doi.org/10.1038/s41467-020-15064-8>, 2020.
- 760
- Mallast, U. and Siebert, C.: Combining continuous spatial and temporal scales for SGD investigations using UAV-based thermal infrared measurements, *Hydrol. Earth Syst. Sci.*, 23, 1375–1392, <https://doi.org/10.5194/hess-23-1375-2019>, 2019.
- 765
- Manheim, F. T.: Section of geological sciences: evidence for submarine discharge of water on the Atlantic continental slope of the southern United States, and suggestions for further search, *Transactions of the New York Academy of Sciences*, 29(7 Series II), 839–853, 1967.
- 770
- Masafumi, K., Susumu, A., Hideo, S., and Hiroshi, S.: Reciprocal data acquisition and subsequent waveform matching for integrated onshore-offshore seismic profiling, *Geophys. J. Int.*, 212(1), 509–521, <https://doi.org/10.1093/gji/ggx374>, 2018.
- 775
- McDonough, L. K., Andersen, M. S., Behnke, M. I. et al.: A new conceptual framework for the transformation of groundwater dissolved organic matter, *Nat. Commun.*, 13(2153), <https://doi.org/10.1038/s41467-022-29711-9>, 2022.
- 780
- Micallef, A., Person, M., Haroon, A. et al.: 3D characterisation and quantification of an offshore freshened groundwater system in the Canterbury Bight, *Nat. Commun.*, 11, 1372, <https://doi.org/10.1038/s41467-020-14770-7>, 2020.
- 785
- Micallef, A., Person, M., Berndt, C., Bertoni, C., Cohen, D., Dugan, B., et al.: Offshore freshened groundwater in continental margins, *Rev. Geophys.*, 58, e2020RG000706, <https://doi.org/10.1029/2020RG000706>, 2021.



- 790 Michael, H. A., Scott, K. C., Koneshloo, M., Yu, X., Khan, M. R., and Li, K.: Geologic influence on groundwater salinity drives large seawater circulation through the continental shelf, *Geophys. Res. Lett.*, 43, 10782–10791, <https://doi.org/10.1002/2016GL070863>, 2016.
- Moore, W. S.: The Effect of Submarine Groundwater Discharge on the Ocean, *Annu. Rev. Mar. Sci.*, 2, 59–88, 2010.
- 795 Moore, W. S., Beck, M., Riedel, T., Rutgers van der Loeff, M., Dellwig, O., Shaw, T. J., Schnetger, B., and Brumsack, H.-J.: Radium-based pore water fluxes of silica, alkalinity, manganese, DOC, and uranium: a decade of studies in the German Wadden Sea, *Geochim. Cosmochim. Acta*, 75, 6535–6555, 2011.
- 800 Moosdorf, N., Böttcher, M. E., Adyasari, D., Erkul, E., Gilfedder, B. S., Greskowiak, J., Jenner, A.-K., Kotwicki, L., Massmann, G., Müller-Petke, M., Oehler, T., Post, V., Prien, R., Scholten, J., Siemon, B., Ehlert von Ahn, C. M., Walther, M., Waska, H., Wunderlich, T., and Mallast, U.: A State-Of-The-Art Perspective on the Characterization of Subterranean Estuaries at the Regional Scale, *Front. Earth Sci.*, 9, 601293, <https://doi.org/10.3389/feart.2021.601293>, 2021.
- 805 Mountain, G.: Portable hires multi-channel seismic shot data from the New Jersey slope acquired during the r/v oceanus expedition oc270 (1995), <https://doi.org/10.1594/IEDA/307762>, 2008.
- 810 Müller, H., von Dobeneck, T., Nehmiz, W. et al.: Near-surface electromagnetic, rock magnetic, and geochemical fingerprinting of submarine freshwater seepage at Eckernförde Bay (SW Baltic Sea), *Geo-Mar. Lett.* 31, 123–140, <https://doi.org/10.1007/s00367-010-0220-0>, 2011.
- 815 Null, K. A., Knee, K. L., Crook, E. D., de Sieyes, N. R., Rebolledo-Vieyra, M., Hernández-Terrones, L., and Paytan, A.: Composition and fluxes of submarine groundwater along the Caribbean coast of the Yucatan Peninsula, *Cont. Shelf Res.*, 77, 38–50, <https://doi.org/10.1016/j.csr.2014.01.011>, 2014.
- Oberle, F. K. J., Prouty, N. G., Swarzenski, P. W. et al.: High-resolution observations of submarine groundwater discharge reveal the fine spatial and temporal scales of nutrient exposure on a coral reef: Faga'alu, AS. Coral Reefs, <https://doi.org/10.1007/s00338-022-02245-8>, 2022.
- 820 Oehler, T., Ramasamy, M., Mintu, E. G., Babu, S. D. S., Dähnke, K., Ankele, M., Böttcher, M. E., Santos, I. R. and Moosdorf, N.: Tropical Beaches Attenuate Groundwater Nitrogen Pollution Flowing to the Ocean, *Environ. Sci. Technol.*, 55(12), 8432–8438, 2021.
- 825 Oehler, T., Bakti, H., Lubis, R. F., Purwoarminta, A., Delinom, R., and Moosdorf, N.: Nutrient dynamics in submarine groundwater discharge through a coral reef (western Lombok, Indonesia), *Limnol. Oceanogr.*, 64(6), 2646–2661, 2019.



- 830 Paldor, A., Katz, O., Aharonov, E., Weinstein, Y., Roditi-Elasar, M., Lazar, A., and Lazar, B.: Deep submarine groundwater discharge—evidence from Achziv submarine canyon at the exposure of the Judea group confined aquifer, Eastern Mediterranean, *J. Geophys. Res. Oceans*, 125(1), e2019JC015435, 2020.
- 835 Peterson, C. D., Jol, H. M., Percy, D., and Perkins, R.: Use of Ground Penetrating Radar, Hydrogeochemical Testing, and Aquifer Characterization to Establish Shallow Groundwater Supply to the Rehabilitated Ni-les' tun Unit Floodplain: Bandon Marsh, Coquille Estuary, Oregon, USA, *J. Geogr. Geol.*, 12, 25–49, 2020.
- 840 Pisternick, T., Lilkendey, J., Audit-Manna, A., Dumur Neelayya, D., Neehaul, Y., and Moosdorf, N.: Submarine groundwater springs are characterized by distinct fish communities, *Mar. Ecol.*, e12610, <https://doi.org/10.1111/maec.12610>, 2020.
- Pohlman, J. W.: The biogeochemistry of anchialine caves: progress and possibilities, *Hydrobiologia*, 677(1), 33–51, 2011.
- 845 Pondthai, P., Everett, M. E., Micallef, A., Weymer, B. A., Faghih, Z., Haroon, A., and Jegen, M.: 3D Characterization of a Coastal Freshwater Aquifer in SE Malta (Mediterranean Sea) by Time-Domain Electromagnetics. *Water*, 12, 1566. <https://doi.org/10.3390/w12061566>, 2020.
- 850 Post, V. E. A., Groen, J., Kooi, H., Person, M., Ge, S., and Edmunds, W. M.: Offshore fresh groundwater reserves as a global phenomenon, *Nature*, 504(7478), 71–78, <https://doi.org/10.1038/nature12858>, 2013.
- Reading, M. J., Tait, D. R., Maher, D. T., Jeffrey, L. C., Correa, R. E., Tucker, J. P., Shishaye, H. A., and Santos, I. R.: Submarine groundwater discharge drives nitrous oxide source/sink dynamics in a metropolitan estuary, *Limnol. Oceanogr.*, 66, 1665–1686, <https://doi.org/10.1002/lno.11710>, 2021.
- 855 Rocha, C., Robinson, C. E., Santos, I. R., Waska, H., Michael, H. A. and Bokuniewicz, H. J.: A place for subterranean estuaries in the coastal zone, *Est. Coast. Shelf Res.*, 250, 107167, 2021.
- 860 Rodellas, V., Garcia-Orellana, J., Masque, P., Feldman, M., and Weinstein, Y.: Submarine groundwater discharge as a major source of nutrients to the Mediterranean Sea, *PNAS*, 112(13), 3926–3930, 2015.
- Roxburgh, I. S.: Thermal infrared detection of submarine springs associated with the Plymouth Limestone, *Hydrolog. Sci. J.*, 30(2), 185–196, 1985.
- 865 Röper, T., Greskowiak, J., and Massmann, G.: Detecting small groundwater discharge springs using handheld thermal infrared imagery, *Groundwater*, 52(6), 936–942, 2014.
- Santos, I. R., Chen, X., Lecher, A.L., Sawyer, A. H., Moosdorf, N., Rodellas, V., Tamborski, J., Cho, H.-M., Dimova, N., Sugimoto, R., Bonaglia, S., Li, H., Hajati, M.-C., and Li, L.: Submarine groundwater



- 870 discharge impacts on coastal nutrient biogeochemistry, *Nat. Rev. Earth. Environ.*, 2, 307 – 323,  
<https://doi.org/10.1038/s43017-021-00152-0>, 2021.
- Sawyer, A. H., David, C. H., and Famiglietti, J. S.: Continental patterns of submarine groundwater discharge reveal coastal vulnerabilities, *Science*, 353, 6300, 7005–707, 2016.
- 875 Schubert, M., Scholten, J., Schmidt, A., Comanducci, J. F., Pham, M. K., Mallast, U., and Knoeller, K.: Submarine Groundwater Discharge at a Single Spot Location: Evaluation of Different Detection Approaches, *Water*, 6, 584–601, <https://doi.org/10.3390/w6030584>, 2014.
- 880 Siemon, B., Ibs-von Seht, M., Steuer, A., Deus, N., and Wiederhold, H.: Airborne Electromagnetic, Magnetic, and Radiometric Surveys at the German North Sea Coast Applied to Groundwater and Soil Investigations, *Remote Sens.*, 12, 1629, <https://doi.org/10.3390/rs12101629>, 2020.
- 885 Sorensen, J. P. R., Aldous, P., Bunting, S. Y., McNally, S., Townsend, B. R., Barnett, M. J., Harding, T., La Ragione, R. M., Stuart, M. E., Tipper, H. J., and Pedley, S.: Seasonality of enteric viruses in groundwater-derived public water sources, *Water Res.*, 207, <https://doi.org/10.1016/j.watres.2021.117813>, 2021.
- 890 Sugimoto, R., Kitagawa, K., Nishi, S., Honda, H., Yamada, M., Kobayashi, S., Shoji, J., Ohsawa, S., Taniguchi, M., and Tominaga, O.: Phytoplankton primary productivity around submarine groundwater discharge in nearshore coasts, *Mar. Ecol. Progr. Ser.*, 563, 25–33, 2017.
- 895 Szymczycha, B., Borecka, M., Białk-Bielińskab, A., Siedlewicz, G., and Pazdro, K.: Submarine groundwater discharge as a source of pharmaceutical and caffeine residues in coastal ecosystem: Bay of Puck, southern Baltic Sea case study, *Sci. Total Environ.*, 713, 136522, 2020.
- 900 Szymczycha, B., Vogler, S., and Pempkowiak, J.: Nutrients fluxes via submarine groundwater discharge to the Bay of Puck, Southern Baltic, *Sci. Total Environ.*, 438, 86–93, 2012.
- 900 Taniguchi, M., Dulai, H., Burnett, K. M., et al.: Submarine Groundwater Discharge: Updates on Its Measurement Techniques, Geophysical Drivers, Magnitudes, and Effects, *Front. Environ. Sci.*, 7, 141, 2019.
- 905 Taniguchi, M., Burnett, W. C., Cable, J. E., and Turner, J. V.: Investigation of submarine groundwater discharge, *Hydrol. Process.* 16, 2115–2129. doi: 10.1002/hyp.1145, 2002.
- Taylor, R., Scanlon, B., Döll, P. et al: Ground water and climate change, *Nat. Clim. Change*, 3, 322–329, 2013.



- 910 Thomas, A. T., von Harten, J., Jusri, T., Reiche, S., and Wellmann, F.: An integrated modeling scheme for characterizing 3D hydrogeological heterogeneity of the New Jersey shelf, *Mar. Geophys. Res.*, 43(2), 1–19, 2022.
- 915 Thomas, B. F., and Famiglietti, J. S.: Identifying Climate-Induced Groundwater Depletion in GRACE Observations, 9, 4124, <https://doi.org/10.1038/s41598-019-40155-y>, 2019.
- Thomas, A. T., Reiche, S., Riedel, M., and Clauser, C.: The fate of submarine fresh groundwater reservoirs at the New Jersey shelf, USA, *Hydrogeol. J.*, 27(7), 2673–2694, <https://doi.org/10.1007/s10040-019-01997-y>, 2019.
- 920 Varma, S., and Michael, K.: Impact of multi-purpose aquifer utilisation on a variable-density groundwater flow system in the Gippsland Basin, Australia, *Hydrogeol. J.*, 20(1), 119–134. <https://doi.org/10.1007/s10040-011-0800-8>, 2012.
- 925 Van Geldern, R., Hayashi, T., Bottcher, M. E., Mottl, M., Barth, J. A. C., and Stadler, S: Stable isotope geochemistry of pore waters and marine sediments from the New Jersey shelf: Methane formation and fluid origin, *Geosphere*, 9(1), 96–112, <https://doi.org/10.1130/GES00859.1>, 2013.
- 930 Van Meter, K. J., Van Cappellen, P., and Basu, N. B.: Legacy nitrogen may prevent achievement of water quality goals in the Gulf of Mexico, *Science* 360, 427–430, 2018.
- 935 Viaroli, S., Lancia, M., and Re, V.: Microplastics contamination of groundwater: Current evidence and future perspectives. A review, *Sci. Total Environ.*, 824, <https://doi.org/10.1016/j.scitotenv.2022.153851>, 2022.
- 940 Virtasalo, J. J., Schröder, J. F., Luoma, S., Majaniemi, J., Mursu, J., and Scholten, J.: Submarine groundwater discharge site in the First Salpausselkä ice-marginal formation, south Finland, *Solid Earth*, 10, 405–423, <https://doi.org/10.5194/se-10-405-2019>.
- 945 von Ahn, C. M. E., Scholten, J., Malik, C., Feldens, P., Liu, B., Dellwig, O., Jenner, A.-K., Papenmeier, S., Schmiedinger, I., Zeller, M. A., and Böttcher, M. E.: A multi-tracer study of fresh submarine and surface water sources for a temperate urbanized coastal bay, *Front. Environm. Sci.*, 9, 642346, 2021.
- 945 Waska, H., and Kim, G.: Submarine groundwater discharge (SGD) as a main nutrient source for benthic and water-column primary production in a large intertidal environment of the Yellow Sea, *J. Sea Res.* 65, 103–113., doi: 10.1016/j.seares.2010.08.001, 2011.
- Waska, H., and Kim, G.: Differences in microphytobenthos and macrofaunal abundances associated with groundwater discharge in the intertidal zone, *Mar. Ecol. Progr. Ser.*, 407, 159–172, 2010.



- 950 Waska, H., Geskowiak, J., Ahrens, J., Beck, M., Ahmerkamp, S., Böning, P., Brusmack, H. J.,  
Degenhardt, J., Ehlert, C., Engelen, B., Grünebaum, N., Holtappels, M., Pahnke, K., Marchant, H. K.,  
Massmann, G., Meier, D., Schnetger, B., Schwalfenberg, K., Simon, H., Vandieken, V., Tzielinski, O.,  
and Dittmar, T.: Spatial and temporal patterns of pore water chemistry in the inter-tidal zone of a high  
energy beach, *Front. Mar. Sci.*, 6, 154, doi:10.3389/fmars.2019.00154, 2019.
- 955 Weymer, B. A., Everett, M. E., Smet, T. S., and Houser, C.: Review of electromagnetic induction for  
mapping barrier island framework geology, *Sediment. Geol.*, 321, 11–24, 2015.
- 960 Weymer, B. A., Wernette, P. A., Everett, M. E., Pondthai, P., Jegen, M., and Micallef, A.: Multi-layered  
high permeability conduits connecting onshore and offshore coastal aquifers, *Front. Mar. Sci.*, 7(903),  
https://doi.org/10.3389/fmars.2020.531293, 2020.
- 965 Whitar, M. J.: Diagenetic relationships of methanogenesis, nutrients, acoustic turbidity, pockmarks and  
freshwater seepages in Eckernförde Bay, *Mar. Geol.*, 182(1–2), 29–53, https://doi.org/10.1016/S0025-  
3227(01)00227-4, 2002.
- 970 Wilson, J., and Rocha, C.: Regional scale assessment of Submarine Groundwater Discharge in Ireland  
combining medium resolution satellite imagery and geochemical tracing techniques, *Remote Sens.  
Environ.*, 119, 21–34, https://doi.org/10.1016/j.rse.2011.11.018, 2012.
- 975 Worzewski, T., Jegen, M., and Swidinsky, A.: Approximation for the 2D coast effect on marine  
magnetotelluric data, *Geophys. J. Int.*, 189, 357–368, https://doi.org/10.1111/j.1365-246X.2012.05385.x,  
2012.
- 980 Yu, X., and Michael, H. A.: Mechanisms, configuration typology, and vulnerability of pumping-induced  
seawater intrusion in heterogeneous aquifers, *Adv. Wat. Resour.*, doi:10.1016/j.advwatres.2019.04.013,  
2019a.
- 985 Yu, X., and Michael, H. A.: Offshore pumping impacts onshore groundwater resources and land  
subsidence, *Geophys. Res. Lett.*, 46, 2553–2562, https://doi.org/10.1029/2019GL081910, 2019b.
- 990 Zamrsky, D., Essink, G. H. O., Sutanudjaja, E. H., van Beek, L. R., and Bierkens, M. F.: Offshore fresh  
groundwater in coastal unconsolidated sediment systems as a potential fresh water source in the 21<sup>st</sup>  
century, *Environ. Res. Lett.*, 17(1), 014021, 2021.
- 995 Zhao, S., Xu, B., Yao, Q., Burnett, W. C., Charette, M. A., Su, R., Lian, E., and Yu, Z.: Nutrient-rich  
submarine groundwater discharge fuels the largest green tide in the world, *Sci. Total Environ.*, 770,  
https://doi.org/10.1016/j.scitotenv.2020.144845, 2021.
- 990 Zipperle, A., and Reise, K.: Freshwater springs on intertidal sand flats cause a switch in dominance among  
polychaete worms, *J. Sea Res.*, 54(2), 143–150, https://doi.org/10.1016/j.seares.2005.01.003, 2005.





995 **Figures**

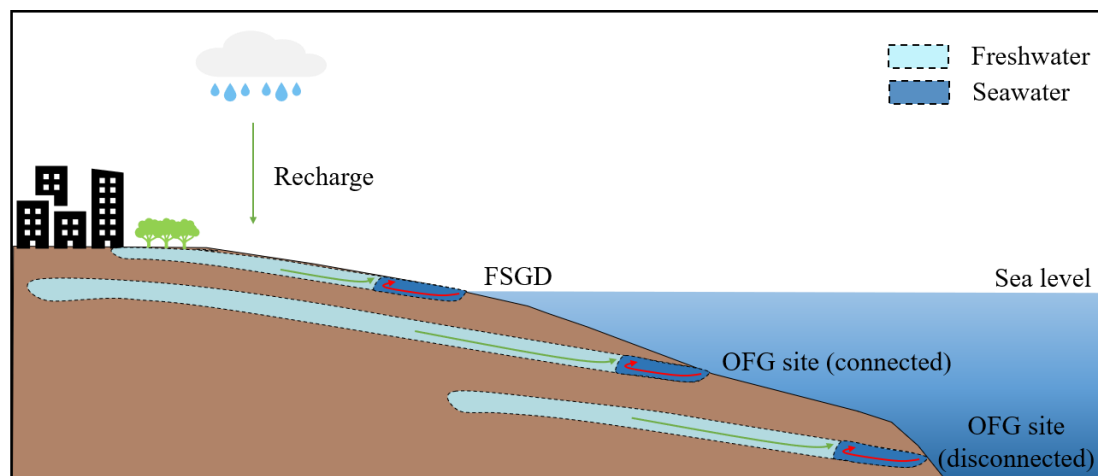

1000 **Figure 1.** Schematic representation of known pathways for the transport of and storage of fresh and freshened groundwater between terrestrial and marine realms. Areas surrounded by dashed lines indicate groundwater reservoirs, whereas arrows represent freshwater (green) and seawater (red) fluxes. Based on Bratton et al. (2010) and Weymer et al. (2020).

1005

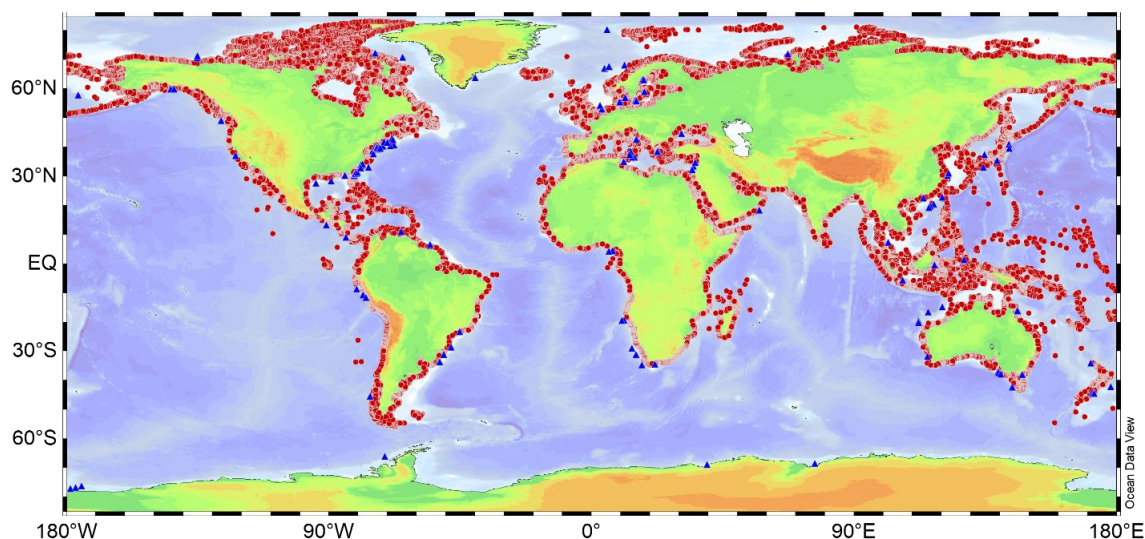

**Figure 2.** Global distribution of reported FSGD (red circles) and OFG (blue triangles) sites. Location data from FSGD and OFG from Luijendijk et al. (2020) and Micallef et al. (2021), respectively.



1010

## Tables

1015

**Table 1.** Key concepts used in this manuscript.

| Term                                         | Definition                                                                                                                                                |
|----------------------------------------------|-----------------------------------------------------------------------------------------------------------------------------------------------------------|
| Meteoric water                               | Waters derived from precipitation. These waters reach the ocean either through surface flows (e.g. rivers), or as groundwater after infiltrates in soils. |
| Aquifer                                      | Underground water reservoir that can consist of several layers of rock or sediments.                                                                      |
| Groundwater                                  | Water reservoir located beneath land surfaces.                                                                                                            |
| Groundwater recharge                         | Replenishment of an aquifer containing groundwater from surface sources.                                                                                  |
| Fresh submarine groundwater discharge (FSGD) | Flow of fresh meteoric groundwater from terrestrial coastal aquifers through the seafloor into the ocean.                                                 |
| Offshore freshened groundwater (OFG)         | Reservoir of fresh and brackish groundwater embedded in sediment pore waters and rocks below the seafloor.                                                |
| Seawater intrusion (SWI)                     | Flows of marine waters into freshwater aquifers.                                                                                                          |
| Non-renewable groundwater                    | Groundwater whose renewal (through recharge) takes place in times scales > 100 years (see Bierkins and Wada, 2019).                                       |
| Fossil groundwater                           | Groundwater stored over millennia in isolated reservoirs below the Earth's surface.                                                                       |
| Subterranean estuary                         | Coastal aquifer connected to the ocean which bears both saline and meteoric waters.                                                                       |

1020 **Table 2.** Commonly used methods for investigating groundwater fluxes and reservoirs. \* Current application realm.

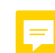

| Approach                                            | Spatial scales | Temporal scales | Captured processes / controlling mechanisms                                                                                        | FSGD/OFG* |
|-----------------------------------------------------|----------------|-----------------|------------------------------------------------------------------------------------------------------------------------------------|-----------|
| Thermal infrared sensing                            | cm to km       | hours to months | Inflow of low-density plumes. Assessment on sea surface temperature anomalies with respect seasonal means                          | FSGD      |
| Electrical ground conductivity                      | m to km        | hours to years  | Temporal variability of fresh-salt interfaces Recirculation fluxes<br>Setting of sub-surface salt balance models                   | FSGD/OFG  |
| Seafloor mapping & Sub-bottom profiling (Acoustics) | cm to km       | -               | Presence of seafloor depressions (e.g. "Wonky Holes")<br>Pockmarks formation                                                       | FSGD/OFG  |
| Electromagnetics                                    | m to km        | -               | Electrical resistivity anomalies within the seafloor and water column that are indicative of active groundwater discharge          | FSGD/OFG  |
| Direct measurements of seepage rates                | cm to m        | hours           | Quantification of fresh groundwater discharge rates                                                                                | FSGD      |
| In-situ surveys with remotely operated vehicles     | m to km        | -               | Quantification of fresh groundwater discharge rates                                                                                | FSGD      |
| Hydrological modelling                              | m to km        | -               | Characterization of groundwater fluxes and chemical transformations<br>Simulation of aquifer properties under hydrological changes | FSGD/OFG  |



|                                                                            |          |                     |                                                                                                                                                           |          |
|----------------------------------------------------------------------------|----------|---------------------|-----------------------------------------------------------------------------------------------------------------------------------------------------------|----------|
| Radon isotopes measurements                                                | cm to km | days                | Assessment of local sources and recent inputs based on strong gradients between groundwater and ocean<br>Tracking of groundwater-derived greenhouse gases | FSGD     |
| Dissolved organic matter measurements                                      | cm to km | -                   | Concentration distributions and composition are used to track FSGD properties and dispersal                                                               | FSGD     |
| Measurements of $\delta^{13}\text{C}$ and $\delta^{15}\text{N}$ signatures | km       | -                   | Assessment of spatial distribution and C and N flows due to FSGD                                                                                          | FSGD/OFG |
| Nutrient analysis                                                          | km       | -                   | Assessment of spatial distribution and estimation of primary production                                                                                   | FSGD/OFG |
| Water isotopes ( $\delta\text{D}$ and $\delta^{18}\text{O}$ )              | m to km  | months to centuries | Identification of recharge processes                                                                                                                      | FSGD     |
| Gas measurements                                                           | cm to km | days to months      | Assessment of FSGD-driven net community production<br>Quantification of trace gas production and emissions to the atmosphere                              | FSGD/OFG |
| Phytoplankton analysis                                                     | km       | -                   | Assessment of FSGD effects on primary production                                                                                                          | FSGD     |
| Benthic fauna sampling                                                     | m to km  | -                   | Assessment of FSGD effects on benthic biomass & diversity                                                                                                 | FSGD     |
| Microbial ecology analyses                                                 | cm to km | -                   | Evaluation of abundance and diversity differences within FSGD sites                                                                                       | FSGD     |
